1 **Rapid evolution of spontaneous mutation increases genetic diversity facilitating plant**  
2 **population survival**

3 Henning Nottbrock<sup>1</sup>, Mao-Lun Weng<sup>1</sup>, Matthew T. Rutter<sup>2</sup> & Charles B. Fenster<sup>1</sup>

4

5 <sup>1</sup>Department of Biology and Microbiology, South Dakota State University, Brookings, SD USA

6 <sup>2</sup>Department of Biology, College of Charleston, Charleston, SC USA

7

8 **Abstract**

9 Using a mechanistic eco-evolutionary trait-based neighborhood-model, we quantify the impact  
10 of mutations on spatial interactions to better understand the potential effect of niche evolution  
11 through mutations on the population dynamics of *Arabidopsis thaliana*. We use 100 twenty-  
12 fifth generation mutation accumulation (MA) lines (genotypes) derived from one founder  
13 genotype to study mutational effects on neighbor responses in a field experiment. We created  
14 individual-based maps (15,000 individuals), including phenotypic variation, to quantify  
15 mutational effects within genotypes versus between genotypes on reproduction and survival.  
16 At small-scale, survival is enhanced but reproduction is decreased when a genotype is  
17 surrounded by different genotypes. At large-scale, seed set is facilitated by different genotypes  
18 while the same genotype has either no effect or negative effects. Mutations may provide a  
19 mechanism for plants to quickly evolve niches and may drive competition, facilitation and  
20 selection with profound consequences for future population and community dynamics.

21 Introduction

22 A complete understanding of population and community dynamics requires linking intraspecific  
23 genetic diversity with spatial ecological interactions (Bolnick et al. 2011, Genung et al. 2011).  
24 Evolutionary mechanisms -- mutation, drift, gene flow and selection -- are responsible for  
25 intraspecific genetic variation contributing to both ecological structure and species diversity  
26 (Hart et al. 2016). These community properties impact ecological mechanisms such as  
27 competition and facilitation (Whitlock 2014). Competition and facilitation in turn affect  
28 population and community dynamics that depend on variation in demographic rates (Chase et  
29 al 2002, Solivers et al 2015). Demographic rates are influenced by spatial interactions of genetic  
30 variation and this variation may contribute to species coexistence: genotypes can hinder or  
31 favor the survival of each other by using similar or different resources with negative or positive  
32 consequences for coexisting species (Hart et al. 2016, Hausch et al. 2018). Intraspecific genetic  
33 variation contributing to individual trait variation and environmental adaptability may promote  
34 species coexistence by both increasing habitat heterogeneity and altering competitive  
35 hierarchies (Violle et al. 2012, Ehlers et al. 2016). However, intraspecific genetic variation may  
36 hinder species coexistence when intraspecific genetic variation is diminished by competition  
37 between individuals (Hart et al 2016). To fully understand the causes of coexistence  
38 mechanisms, we need to integrate intraspecific evolutionary mechanisms with intraspecific  
39 ecological mechanisms underlying spatial species interactions (Bolnick et al. 2011, Ehlers et al.  
40 2016).

41

42           The number of studies exploring eco-evolutionary dynamics and their potential  
43 feedbacks on population and community dynamics has dramatically increased over the last two  
44 decades (Shefferson and Salguero-Gomez 2015). An important current issue in community and  
45 ecosystem genetics research is determining the relevance of intraspecific genetic variation and  
46 genetic differentiation (divergence) to ecological and evolutionary processes at the community  
47 and ecosystem level (Genung et al. 2011, Pujol et al. 2018). Quantifying intraspecific trait  
48 variation defining the fundamental niches of species is an important link between ecology and  
49 evolution (Violle and Jiang 2009). Spatial structure is another important component of realistic  
50 eco-evolutionary dynamics, such that in spatially structured populations, selection is  
51 determined by the interplay between demographic and genetic structures (Lion et al. 2011).  
52 Demographic structure describes the spatial distribution of individuals through birth, death and  
53 migration resulting in spatial patterns, while genetic structure describes the spatial distribution  
54 of genotypes. The amount and spatial pattern of genetic variation may constrain evolution of  
55 traits influencing competitive ability of individuals (Wilson 2014). Moreover, competitive  
56 abilities depend on species' niches. The strength of competition is determined by how much  
57 individual niches overlap with each other (Hutchinson 1957, Holt 2009) and how long  
58 coexistence has occurred (Connell 1980).

59  
60           Species niche breadths are reflected by individual trait variability and intraspecific and  
61 interspecific genetic and spatial interactions driven by environmental conditions. Thus,  
62 intraspecific trait variability shaped by intraspecific genetic variation can influence ecological  
63 mechanisms driving variation among individual persistence (Lankau 2009). Only when the

64 spatial relationship between traits and demographic parameters is explicitly described can  
65 robust hypotheses about the effects of individual variation on competitive outcomes be  
66 accurately formulated (Hart et al. 2016). Especially in controlled common garden environments,  
67 genetic variation in one species can have predictable and heritable effects on associated  
68 communities and ecosystems (Carr and Dudash 1995; Whitham et al. 2003, 2006; Johnson &  
69 Stinchcombe 2007; Bailey et al. 2009; Johnson, Vellend & Stinchcombe 2009). Hence, coupling  
70 evolutionary genetics with community ecology may advance our understanding of species  
71 interactions and population and community dynamics (Baron et al. 2016), especially for  
72 populations and communities that suffer environmental change (Bellard et al. 2012).

73  
74 An important gap in our understanding of the link between evolutionary and ecological  
75 processes is the nearly complete absence of data quantifying how rapidly genetic variation  
76 governing within species competitive hierarchies evolves (Hausch et al. 2018). An important  
77 source of novel population genetic variation is mutation. Therefore, we aim to investigate the  
78 link between evolutionary genetics and spatial ecological interactions of mutation accumulation  
79 lines (MA lines) in the model plant organism *Arabidopsis thaliana* (Brassicaceae) to advance our  
80 understanding of the genetic origins of population and community dynamics, contributing to a  
81 fuller understanding of the maintenance of biodiversity. We take advantage of 25th generation  
82 *A. thaliana* mutation accumulation (MA) lines that were planted under field conditions in years  
83 2004 and 2005 with spatial records of each individual each year (e.g., Rutter et al. 2010; 2012,  
84 Rutter et al. 2018) (Fig. 1).

85

86           Here we focus on the neighborhood effects of MA lines on focal plants from the same  
87 MA line (within genotypes) or different MA lines (between genotypes) to quantify the evolution  
88 of intraspecific genetic variation through the accumulation of spontaneous mutations. We  
89 implement trait-based neighborhood models (Nottebrock et al. 2017a, Nottebrock et al. 2017b,  
90 Lachmuth et al. 2017) to understand ecological mechanisms of within and between MA lines  
91 genetic variation to examine eco-evolutionary dynamics (Lion 2018). Specifically, we ask: 1) Do  
92 spontaneous mutations rapidly introduce enough genetic variation among MA lines to influence  
93 competition and facilitation of *A. thaliana*? 2) Do spontaneous mutations of MA lines  
94 contribute to competition, facilitation and selection promoting differential MA line survival and  
95 reproduction at different spatial scales? 3) How may competitive and facilitative effects  
96 potentially determine population and community dynamics?

97

## 98 Methods

99 MA lines are generated from a single nearly homozygous individual founder and cultivated via  
100 limited effective population number. In the case of *A. thaliana*, this occurs through single seed  
101 descent, resulting in  $N_e = 1$ . Thus typical MA line cultivation results in an unbiased sample of  
102 mutation effects ranging from deleterious to advantageous, although lethal mutations are  
103 excluded (Lynch and Walsh 1998). Each MA line accumulates independent spontaneous  
104 mutations. After the propagation of a set of MA lines through multiple generations, the genetic  
105 differences among the MA lines and between those lines and the founder reflect the input of  
106 mutation. Significant MA line effects for multiple traits, including performance and trait  
107 measures, were found under both field and greenhouse conditions (Rutter et al. 2010; Roles et  
108 al. 2016, Rutter et al. 2018). Each of the MA lines in our experiment is fixed for an average of 20  
109 different sequence level mutations, single nucleotide mutations (SNMs) and indels combined  
110 (Ossowski et al 2010, Rutter et al. 2012, Weng et al. 2019).

111

### 112 *MA lines and field experiments*

113 We used survival and seed set data of *A. thaliana* MA lines and the founder as assessed in field  
114 experiments in 2004 and 2005 from Rutter et al. (2010, 2012 and 2018) planted in a  
115 randomized design (Fig. 1). Rutter et al. (2010, 2012) planted seedlings of 100 MA lines and the  
116 founder at the four-leaf stage, approximately two weeks post germination, into a secondary  
117 successional field at Blandy Experimental Farm (BEF) in Virginia (39°N, 78°W). Each of the 100  
118 MA lines was used to found up to five sublines to minimize biases due to maternal effects

119 introduced by the specific location within the greenhouse. We founded six sublines from each  
120 of the six lines representing the premutation founder genotype. In 2003, subline plants were  
121 used to generate all seed utilized in all field experiments. In each planting, 7504 individuals  
122 were planted, 7000 individuals of 100 MA lines (70 replicates per MA line, 14 replicates per  
123 subline) and 504 individuals of the founder (14 replicates per subline). The planting  
124 environment corresponds to a spring ephemeral life-history, where plants germinate and  
125 complete the life-cycle in the spring. At the time of planting, vegetation was scant but present.  
126 By harvest, the *A. thaliana* individuals were dwarfed by naturally occurring vegetation.

127

128         The plot was arranged in 14 spatial blocks with each containing 12 subblocks (Fig. 1B)  
129 (total plot area approximately 35 x 25 m). Each block included one seedling from each subline  
130 and in total 7504 individuals. We used the spatial information of each individual within the  
131 described design and created a raster of all plant individuals with R packages (raster, maps,  
132 maptools). We used individual-based maps neighborhood matrices with exact spatial and trait  
133 information of each genotype. If all five sublines did not produce enough seedlings to distribute  
134 in all blocks, seedlings from other sublines of the same MA line were overrepresented in blocks  
135 to maintain the same overall number of plants per MA line. Plants dying within the first 3 days  
136 of transplant (about 50 plants) were considered to have died from transplant shock and were  
137 replaced with another plant from the same MA line. Plants were censused weekly for survival.  
138 Plants were harvested by late May, by which time they had senesced. In 2004 a total of 5915  
139 individuals including 394 founders survived. In 2005, a total of 4506 individuals survived

140 including 302 founders. Plants were oven dried and biomass was measured. All fruits produced  
141 by each plant were counted and in combination with seed production used as the  
142 measurements of seed set. For our analysis, we used measurements of two response variables  
143 representing an important part of the life history of *A. thaliana* to calculate direct  
144 neighborhood effects on: a) the survival rate of plant individuals and b) individual seed set from  
145 plants that survived and produced fruits.

146



147 *Statistical Analyses*

148 We use eco-evolutionary trait-based neighborhood models that include intraspecific genetic  
149 variation and phenotypic variation expressed by plant trait biomass to analyze competition and  
150 facilitation between individuals of *A. thaliana*. We analyzed plant survival rate and focal seed  
151 set measurements from years 2004 and 2005 separately. For each year, we considered all  
152 individuals as focal plants in the analysis based on individual-based neighborhood matrices to  
153 analyze 1) rate of plant survival to reproduction and 2) seed set of those plants that survived to  
154 reproduction. We analyzed neighboring plants to focal plants in a radius of 80 cm (small-scale)  
155 or 200 cm (large-scale) of a given focal plant as two spatial scales in the neighborhood analyses  
156 (Fig. 1) to quantify selection, competition or facilitation between plants depending on their  
157 genotypic and phenotypic variation.

158

159 We used extensions of linear mixed models (package lme4, Bates et al. 2014) in R ver.  
160 3.3.3 ([www.r-project.org](http://www.r-project.org)) to conduct neighborhood analyses of focal seed set and survival. We  
161 assumed binomial errors for the analyses of plant survival and Poisson errors for analyses of  
162 seed set. The mixed models described interactions among plants by including neighborhood  
163 indices as explanatory variables at two spatial scales in separate models. Neighborhood indices  
164 are spatial density effects of surrounding neighborhood plants that affect focal seed set and  
165 survival. For each plant, we used the Euclidian distance between the focal plant and the  
166 neighboring plants to compute response effects of intra- (same genotype) or inter-genotypic  
167 (different genotype) neighbors in a given radius around focal plants (Nottebrock et al. 2017).  
168 Moreover, we used a neighborhood index that accounts for the decline of neighbor effects with

169 distance from the focal plant (Uriarte et al. 2010) and summed the amount of biomass from all  
170 individuals in a radius of 80 cm or 200 cm respectively by a Gaussian interaction kernel  
171 (Lachmuth et al. 2018, Nottebrock et al. 2017, Damgaard 2004). We used random effects of  
172 block and subblock to correct for environmental variation between local heterogeneous  
173 conditions. Importantly, we correct for between MA line effects by including MA lines as a  
174 random effect. In addition, including a random slope of biomass on each random intercept  
175 corrects for the intraspecific phenotypic variation depending on local conditions of plant focal  
176 individuals. Moreover, the weighted neighborhood density by plant biomass accounts for  
177 environmental variation between neighboring plants. Our model parameters and a detailed  
178 model description of subblock and block models can be found in S1 supplementary text  
179 (Supplementary Material).

180

181 Neighborhood matrices of all individuals (individual-based maps) were used to analyze  
182 the effect of intra- and inter-genotypic neighbors on survival and focal seed set with spatial  
183 interaction kernels of neighborhood (plant biomass) density. By incorporating different  
184 genotypes and phenotypic variation, we can quantify how important genetic variation is for  
185 neighborhood models and if the phenotypic variation explains spatial interactions between  
186 individuals. We assume the consequences of genetic differences to be larger between MA lines  
187 than between any MA line with the founder. This is a valid assumption since each MA line  
188 differs from the other by approximately  $20 + 20 = 40$  mutations, while any two replicates within  
189 a MA line will differ by one generation,  $\leq 2$  mutations. Thus, we simulated line effects from

190 parameters derived from MA lines as random effects with the R package ‘merTools’ and the  
191 function ‘plotREsim’ in R 2018.

192

193 We used the trait values of neighbors to calculate trait-based neighborhood indices  
194 including plant biomass as a trait (Goldberg & Fleetwood, 1987; Goldberg & Landa, 1991; Cahill  
195 et al., 2005). We fitted eco-evolutionary trait-based neighborhood models at two different  
196 spatial scales for response variables (survival and seed set) for each of the two and both years.  
197 To address our objectives, we first analyzed models with differential effect in which intra-  
198 genotypic neighbors (within all MA lines and founder) had a different effect on survival (A1, A2,  
199 Table 1) and seed set (B1, B2, Table1) than inter-genotypic neighbors at small-scale (s) and  
200 large-scale (l). In addition, we analyzed models with neutral effects on survival (A1, A2, Table 1)  
201 and seed set (B1, B2, Table 1) that included total neighbor density without the split between  
202 intra-genotypic and inter-genotypic neighbors at small-scale (s) and large-scale (l). To this end,  
203 all models were fitted with two separate neighborhood indices that were calculated from intra-  
204 and inter-genotypic neighbors. To justify the inclusion of individual plant biomass as trait-values  
205 for interacting plants in the model, we used AICc to compare the models with and without the  
206 trait-proxy (Burnham and Anderson 2002). We found that all models perform better including  
207 biomass as a trait-proxy ( $\Delta AICc > 2$ ). All eco-evolutionary trait-based neighborhood models  
208 contained random effects of subblock nested in block at block scale and subblock scale on the  
209 intercept, MA line identity on the intercept and the focal trait-value (plant biomass) on the  
210 slope. Additionally, because direct environmental variables were not measured during the field  
211 experiments, we included in each model the individual’s biomass to correct for environmental

212 conditions for spatial autocorrelation. All variables are scaled and centered to assure  
213 comparability between predictor variables. Models of differential and neutral effects for 2004  
214 and 2005 (Table 1, A1-A2, B1-B2) are fitted at small-scale (80cm scale) and at large-scale  
215 (200cm scale). Hereafter, the 80 cm scale models are referred to as “small-scale” models and  
216 the 200 cm scale models are referred to as “large scale” models. Neighborhood indices, intra-  
217 and intergenotypic variation and total variation of biomass density are included as inverse  
218 density variables ( $1/1+\text{density}$ ). We compared models of differential and neutral effects  
219 through likelihood ratio tests (LRTs).

220

221 Results

222 Focal plants surrounded by plants of the same genotypes varied from 0 to 6 individuals at small-  
223 scale (sub-block) and 5 to 6 individuals at large-scale (block). After determining that eco-  
224 evolutionary trait-based models perform better when including plant biomass as a trait proxy to  
225 calculate trait-based neighborhood indices we found that all models including plant biomass  
226 perform better than models including only neighborhood density ( $\Delta AIC > 2$ , Supplementary  
227 Material S2).

228

229 *Weighted neighbor effects of biomass density on genotypes for plant survival*

230 At small-scale, survival rate is larger when surrounded by inter-genotypic than intra-genotypic  
231 neighbors for both years 2004 and 2005 (model A1 and A2; Table 2 and Fig. 2a). This difference  
232 of survival rate between intra- and inter-genotypic plants indicates that inter-genotypic  
233 neighbors select for genotypic diversity and show stronger competitive effects on the survival  
234 of intra-genotypic neighbors at small-scale. This finding is demonstrated by the superior  
235 performance of the differential model relative to the neutral model (year 2004: LRT:  $\chi^2_{1DF} =$   
236 5.21,  $p < 0.05$ ; year 2005: LRT:  $\chi^2_{1DF} = 14.73$ ,  $p < 0.001$ ). The differential and neutral models of  
237 survival at large-scale have only non-significant effects (Table 2). In addition, comparing the AIC  
238 we found that models at large-scale perform worse than at small-scale for both 2004 and 2005  
239 (Table 2). We therefore will only discuss small-scale effects on survival. The distance kernel  
240 ( $\alpha$ ) at small-scale shows that neighboring plants of different genotypes reduce plant  
241 survival by 50% at 53 cm in 2004 and 48 cm in 2005.

242 *Weighted neighbor effects of biomass density on genotypes for seed set*

243 At both small and large scales, the differential model performs better than the neutral model:  
244 at small scales (year 2004: LRT:  $\chi^2_{1DF} = 52.48$ ,  $p < 0.001$ ; year 2005: LRT:  $\chi^2_{1DF} = 17.37$ ,  $p < 0.001$ ;  
245 respectively) and at large scale (year 2004; LRT:  $\chi^2_{1DF} = 679.44$ ,  $p < 0.001$ ; year 2005: LRT:  $\chi^2_{1DF} =$   
246 21.17,  $p < 0.001$ ; respectively). The small-scale model of seed set that included weighted  
247 biomass densities demonstrates the reduction of seed set is larger when surrounded by inter-  
248 genotypic than intra-genotypic neighbors for both years 2004 and 2005 (model B1 and B2;  
249 Table 2 and Fig. 2a). The difference between intra- and inter-genotypic plants indicates that  
250 inter-genotypic neighbors have a stronger competitive effect on seed set than intra-genotypic  
251 neighbors at small-scale. In contrast, at large-scale seed set increases when surrounded by  
252 inter-genotypic neighbors but decreases when surrounded by intra-genotypic neighbors for  
253 both years 2004 and 2005 (model B1 and B2; Table 2 and Fig. 2b). Comparing the AIC between  
254 small and large-scales, models at large-scale for 2004 and 2005 perform better (Table 2).

255

256 *Genotype effects on plant survival and seed set*

257 The distance kernel at small-scale in 2004 indicates a reduction of seed set (competition)  
258 whereas at large-scale are consistent with an increase of seed set (facilitation). Neighboring  
259 plants from all genotypes of *A. thaliana* at small-scale reduce 50% of focal seed set at 23 cm  
260 and at large-scale facilitate 50% of focal seed set at 86 cm. The estimation of genotype effects  
261 (MA lines and founder) simulated as conditional means and expressed as odds ratios show  
262 hierarchical orders of MA line and founder competitive effects at small-scale (Fig. 3). We found

263 no significance of simulated competitive effects of all MA lines and founder calculated from  
264 survival and seed set models at small-scale (ANOVA,  $p > 0.1$ , Fig. 4a). In addition, we found no  
265 significant correlation between competitive effects of MA lines and founder at large-scale. In  
266 addition, we did not find selective effects of MA lines and founder on the survival at small-scale  
267 (ANOVA,  $p > 0.1$ , Fig. 4b). However, we found strong correlation between competitive effects  
268 of MA lines and founder at small-scale and large-scale indicating a genetic trade-off (ANOVA,  
269  $F=460.07$ ,  $P < 0.0001$ , Fig. 4c).

270

271 Discussion

272 We are able to quantify individual spatial interactions between and within genotypes (MA lines  
273 and founder) using a mechanistic eco-evolutionary trait-based neighborhood model. We  
274 demonstrate intraspecific genetic variation due to spontaneous mutations can shape  
275 competitive abilities of genetically different individuals of *A. thaliana*. Notably, these  
276 differences arose in just 25 generations of mutation and in the absence of natural selection.  
277 Many of the mutations differentiating the MA lines also appear in nature, contributing to *A.*  
278 *thaliana* genetic polymorphism (Weng et al., 2019). Plant survival is higher when surrounded by  
279 inter-genotypic neighbors supporting genetic diversity. Effects on focal seed sets were reversed  
280 between small and large scales; inter-genotypic neighbors have stronger negative (competitive)  
281 or positive (facilitative) effects than intra-genotypic neighbors on focal seed sets at small-scale  
282 or large-scale, respectively. Moreover, at small-scale, competitive effects of different MA lines  
283 have similar impacts on survival and seed set. At large-scale, the intra-genotypic effect on  
284 survival turns into less competitive effects on seed set. In contrast, different genotypes show  
285 stronger facilitative effects within the population at large-scale, maybe because plants are more  
286 competitive against other species. Below we discuss how these scale effects provide insight on  
287 community assembly and potential coexistence.

288

289 *Selection, Competition and Facilitation*

290 Because of stronger statistical signals of effect sizes between genotypes than within genotypes,  
291 niche variation may result in niche expansion or reduction (Ehlers et al. 2016). However, these



292 competitive effects only occur between plants that survive to reproduction and affect seed-set.  
293 The neighbor effect on plant survival suggests kin recognition despite our randomized field  
294 experiment that likely reduced the spatial autocorrelation of genotypes (Hamilton 1964,  
295 Kubisch et al. 2013). Seed-dispersal is limited in space because the *A. thaliana* fruit do not  
296 dehiscently explode as they do in related species (Hofhuis and Hay 2017), although a seed bank  
297 ensures some dispersal through time (Falahati-Anbaren et al. 2014). The neighbor effect  
298 increasing genetic diversity of *A. thaliana* populations can have a positive effect on the  
299 coexistence of competing species (Vellend 2006). If we assume that the increase of genetic  
300 diversity due to spontaneous mutations of *A. thaliana* affects the extent of individual plant  
301 niches, at large-scale the inclusion of other plant species should result in stronger competitive  
302 effects of *A. thaliana* with other plant species (Hausch et al. 2018). We demonstrate that *A.*  
303 *thaliana* individuals increase their competitive abilities with an increase of genetic diversity,  
304 perhaps due to the expansion of their individual niches due to more variation in plant traits.

305

306 Antagonistic interactions between genotypes on different spatial scales may result in  
307 genetic trade-offs when mutations are advantageous or deleterious, which over many  
308 generations could provide a strong stabilizing force maintaining both species and genetic  
309 diversity in this system and promote coexistence (Lankau 2008). Thus, spontaneous mutation  
310 could also provide an additional evolutionarily stabilizing effect on community dynamics. Our  
311 study demonstrates the potential for a fundamental evolutionary process, mutation, to have  
312 profound consequences for community structure. When *A. thaliana* is rare, selection would  
313 favor genotypes that compete well and enhance the population's survival relative to that of its

314 interspecific competitor (Lankau 2009). In contrast, when *A. thaliana* is common and the  
315 interspecific competitor is rare, selection would favor *A. thaliana* genotypes that are good  
316 intraspecific competitors. This trade-off may result in a decrease in the interspecific competitive  
317 ability of *A. thaliana*, effectively increasing the competitor's fitness relative to that of *A.*  
318 *thaliana* (Lankau 2009, Lankau and Strauss 2007). However, the genetic trade-off between  
319 intra-and interspecific competitive abilities due to mutation remains unknown because our  
320 dataset only includes performance of *A. thaliana* individuals without quantifying the  
321 surrounding intraspecific environment (Chesson 2000, Adler et al. 2007).

322

### 323 *Competitive Hierarchies of MA lines and Founder lines*

324 Our result show scale dependent competition and facilitation (Nottebrock et al. 2017b)  
325 providing further evidence that in a relative short evolutionary time scale spontaneous  
326 mutations may change the competitive hierarchies between founders and specific MA lines due  
327 to advantageous or deleterious mutations (Rutter et al. 2010). In contrast to Masclaux et al.  
328 2010, we found differential responses to similar genotypes vs different genotypes in *A. thaliana*  
329 depending on the neighbor effect on the plant survival or seed set. However, the interaction  
330 between similar genotypes and different genotypes seems to depend on the strength of the  
331 competitive abilities of the accessions (this study). Comparisons between MA lines and founder  
332 demonstrate that competitive hierarchies follow different orders and competitive effects occur  
333 at different life-history stages at different spatial scales. Eco-evolutionary processes might  
334 reflect spatial selection for diversified genotypes because of niche evolution and individuals of  
335 different genotypes that survived to reproduction have stronger competitive abilities (Ehlers et

336 al. 2016). Moreover, the hierarchical order of competitive effects between MA lines and  
337 founders shows strong variation.

338

### 339 *Eco-evolutionary dynamics*

340 Populations can adapt evolutionarily to their environment on a time scale equivalent to that of  
341 ecological processes and affect present day species interactions, i.e., coexistence (Fussmann et  
342 al. 2007). Yet, sustained and rapid climate change could deplete genetic variance faster than it  
343 can be replenished by mutation (Fournier-Level et al. 2016). In our study, we show that only 25  
344 generations are enough to influence present day plant interactions of *A. thaliana* in the  
345 presence of other plant species. Possible effects of mutations on trait mechanisms might reflect  
346 the increased seed set of *A. thaliana* at large-scale, because of the presence of another plant  
347 species allowing the establishment and growth of *A. thaliana* (Ehlers et al. 2016). Many traits  
348 can influence competition and facilitation between individuals of different genotypes (e.g.  
349 Chapin et al. 1993; Caradus and Woodfield 1998; Hausmann et al. 2005). Intraspecific  
350 competition between *A. thaliana* individuals tends to be higher than between interspecific  
351 competitors (Lankau and Strauss 2007, Van Dam and Baldwin 1998; Tiffin 2002, Strauss and  
352 Irwin 2004). Such spatial mechanisms might be described by the scale difference of competition  
353 at small-scale and facilitation at large-scale between different *A. thaliana* genotypes.  
354 Competition and facilitation are therefore dependent on the extension or reduction of  
355 individual niches, which is based on the ability to advance or distract traits due to spontaneous  
356 mutations. However, we are not able to directly link our results to benefactor or antagonistic  
357 plants, because we focused in our experiment on *A. thaliana* densities and fitness components.

358 Nevertheless, genotypic-specific interactions are well studied. A number of studies of *A.*  
359 *thaliana* MA lines demonstrate mutation effects on plant traits such as leaf weight, flowering  
360 time, trichome density, number of leaves at bolting, duration of vegetative and flowering  
361 period (Camara and Pigliucci 1999, Rutter et al. 2010, Stearns and Fenster 2016). It is  
362 conceivable that the increase in variance of these traits through spontaneous mutations could  
363 contribute to the evolution of competitive hierarchies.

364

### 365 *Consequences for population and community dynamics*

366 Competition between genetically different individuals of *A. thaliana* at small-scale and  
367 facilitation at large-scale has important implications for population structure (Cahill et al. 2005).  
368 Plants may cooperate by competing less, or act selfishly by competing more (Dudley et al.  
369 2013). However, kin recognition might be the result of kin selection when occurring in a  
370 heterogeneous environment with various genotypes (Hamilton 1964). Especially, at large-scale,  
371 we show that different genotypes facilitate seed set that stabilize the population dynamics by  
372 increasing the performance of neighboring plant individuals (Latzel et al. 2013, Castellanos et al.  
373 2014). Thus, selection for diversified genotypes might reveal a coexistence mechanism, because  
374 mutations at a short time scale (25 generations) are able to alter the competitive hierarchies of  
375 *A. thaliana* individuals of different genotypes. These genotypes might expand or reduce their  
376 niches and can therefore act more competitive against strangers (Ehlers et al 2016). Moreover,  
377 variation in competitive ability among genotypes due to mutation can lead to intransitive  
378 competitive hierarchies at a small-scale, and allow coexistence of competitors at large-scale  
379 when there is no single dominant competitor (Vellend and Geber 2005, Taylor and Aarssen

380 1990, Laure et al. 2017). This might also reflect the genetic trade-off between competitive  
381 abilities of MA lines of small-scale competition and of large-scale facilitation (Timan 2004). Low  
382 competition between *A. thaliana* individuals at small-scale transmits into low facilitation  
383 between different species at larger scale. In turn, strong competition within *A. thaliana* at  
384 small-scale results in weaker competition between different species at large-scale. Thus, the  
385 constant input of mutation to genetic variation of competitive hierarchies suggests that genetic  
386 variation is likely never a limiting factor in the evolution of those traits that influence plant  
387 community dynamics.

388

### 389 *Implementation of eco-evolutionary trait-based model for population and community ecology*

390 In ecology, two primary contrasting models are crucial to population and community dynamics  
391 for understanding the maintenance of biodiversity: the niche and neutral theories of ecology  
392 (Fisher and Mehta 2015). The niche theory claims that niches are determined by the difference  
393 of abiotic or biotic ecological processes e.g. competition or facilitation (Hutchinson 1957, Bruno  
394 et al. 2003, Colwell and Rangel 2009) whereas the neutral theory predicts that ecological  
395 processes are neutral and are solely modified by stochasticity (Hubbel 2005). Although it is still  
396 under debate which model predicts the dynamic properties of communities and determines the  
397 maintenance of biodiversity (Violle et al. 2017), both models miss the importance of  
398 evolutionary mechanisms and individual variation influencing population and community  
399 dynamics (Violle et al. 2012). The difference of competition and facilitation between or within  
400 genotypes demonstrates that evolutionary mechanisms that shape individual variation could

401 change hierarchies of intra-specific interactions in natural plant populations over a short  
402 evolutionary time scale. Our results are concordant with the niche theory stressing the  
403 changing of competitive hierarchies among phenotypes in a given environment (Levine and  
404 HilleRisLambers 2009, Nottebrock et al. 2017). Moreover, selection and trait evolution favor  
405 population survival of *A. thaliana* in the wild, which stresses the importance of combining  
406 spatial ecological and evolutionary mechanisms for our understanding of population and  
407 community dynamics.

408

409 Conclusion

410 Rapid evolution of *A. thaliana* due to spontaneous mutation alone has profound consequences  
411 for population and community dynamics. Competition of *A. thaliana* individuals is genotype-  
412 dependent and *A. thaliana* is not a single weak competitor among co-occurring plant species  
413 (Ehlers et al. 2016, Soliveres et al 2017). Moreover, the discovery of the underlying eco-  
414 evolutionary nature of competition in *A. thaliana* supports a shift from species-based to  
415 individual-based community ecology. This would lead to a more predictive ecological theory  
416 (Violle et al 2017). We show that including the intraspecific genetic variation and phenotypic  
417 variation as separate aspects to a trait-based neighborhood model increases the predictive  
418 power to understand population and community dynamics. In particular, non-neutral  
419 intraspecific processes may determine species coexistence, because genetic diversity is  
420 promoted by having stronger competitive abilities at small-scale and stabilizing population  
421 survival at large-scale (Clark et al. 2010). Additionally, our study demonstrates higher genetic  
422 diversity increases population survival due to rapid evolution with implications to forecast the  
423 fate of species and functional diversity in response to environmental changes (Violle et al 2012).  
424 Depending on the time of environmental changes, species may adapt to environmental change  
425 by shifting their fundamental niches (Clark 2010). The combination of intraspecific genotypic  
426 variation and spatial interactions might advance our understanding of community dynamics,  
427 especially of rapid evolution (Koch et al. 2014, Turcotte and Levine 2016). Incorporating genetic  
428 variation and the eco-evolutionary process for determining standing levels of genetic variation  
429 will provide a better understanding of species interactions underlying the maintenance of  
430 biodiversity.

431

432 Keywords (10 for indexing purpose): trait-based community ecology, spontaneous mutations,  
433 competition, facilitation, niche evolution, intraspecific genetic variation, intraspecific  
434 phenotypic variation, *Arabidopsis thaliana*, mutation accumulation lines, eco-evolutionary  
435 dynamics.

436



437 Figures and Tables

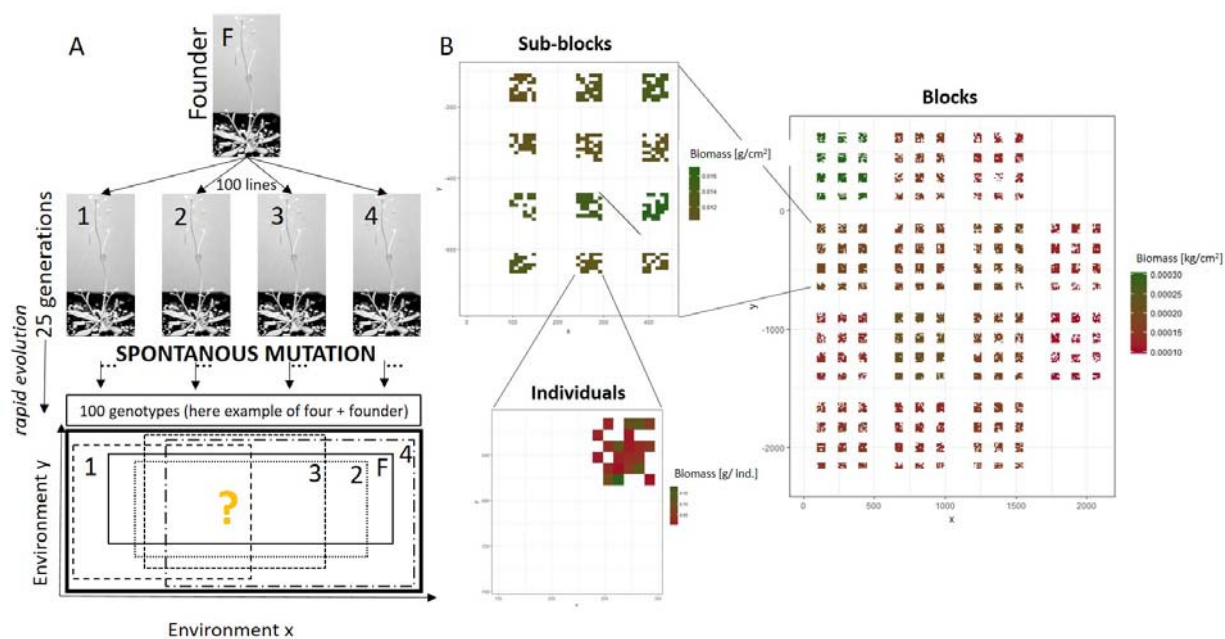

438  
439 Figure 1. (A) 100 Mutation accumulation lines (here example of four MA-lines) of *Arabidopsis*  
440 *thaliana* derived from a single founder (Columbia) after 25 generations with a mutation rate of  
441  $\sim 0.7$  per generation (Weng et al. 2019). Each MA line has a unique genotype that differs from  
442 the founder. Fundamental niche of individual genotypes (different dashed and dotted lines) and  
443 founder genotype (black line) are distributed within the hypothetical fundamental niche of a  
444 population of *A. thaliana* (bold black line). Axes represent niche axis (resource-use,  
445 environmental factors, etc.). (B) Planting design of *A. thaliana* in a natural field experiment  
446 showing spatial biomass variation of individual survivors in 2004.

447

|                            | Year 2004 | Year 2005 | Model        |
|----------------------------|-----------|-----------|--------------|
| <b>Individual survival</b> | A1 (s,l)  | A2 (s,l)  | Differential |
|                            | A1 (s,l)  | A2 (s,l)  | Neutral      |
| <b>Seed set</b>            | B1 (s,l)  | B2 (s,l)  | Differential |
|                            | B1 (s,l)  | B2 (s,l)  | Neutral      |

448

449 Table 1. Table of all different eco-evolutionary trait-based neighborhood models including  
450 intraspecific variation to test our three objectives of density effects on survival and seed set of  
451 *A. thaliana*. Differential models split the neighbor responses into within genotypes and  
452 between genotypes. Neutral models describe the overall neighbor response without  
453 differentiating between genotypes. All models include random effects of plant biomass on the  
454 slope, subblock or block and MA-line on the intercept (see Fig. 1 for design), and respectively  
455 depending on small (s) or large-scale (l) (for more details see method section).

| <b>Survival model</b>   |              |                               |              |            |                                 |                     |            |
|-------------------------|--------------|-------------------------------|--------------|------------|---------------------------------|---------------------|------------|
| <b>(A1) 2004</b>        |              | <b>(s) Small scale (80cm)</b> |              | <b>AIC</b> | <b>(l) Larger scale (200cm)</b> |                     | <b>AIC</b> |
|                         |              | <i>Intra</i>                  | <i>Inter</i> |            | <i>Intra</i>                    | <i>Inter</i>        |            |
| <b>Weighted density</b> |              |                               |              |            |                                 |                     |            |
| <b>MA</b>               | neutral      | -0.02 <sup>ns</sup>           |              | 7551.7     | 0.004 <sup>ns</sup>             |                     | 7644.5     |
| <b>Lines</b>            | differential | -0.02 <sup>ns</sup>           | -0.37**      | 7548.6     | 0.15 <sup>ns</sup>              | -0.30 <sup>ns</sup> | 7644.2     |
| <b>(A2) 2005</b>        |              |                               |              |            |                                 |                     |            |
|                         |              | <b>(s) Small scale (80cm)</b> |              | <b>AIC</b> | <b>(l) Larger scale (200cm)</b> |                     | <b>AIC</b> |
|                         |              | <i>Intra</i>                  | <i>Inter</i> |            | <i>Intra</i>                    | <i>Inter</i>        |            |
| <b>Weighted density</b> |              |                               |              |            |                                 |                     |            |
| <b>MA</b>               | neutral      | 0.03 <sup>ns</sup>            |              | 9637.3     | 0.03 <sup>ns</sup>              |                     | 9872.9     |
| <b>lines</b>            | differential | -0.02 <sup>ns</sup>           | -0.28***     | 9626.1     | 0.05 <sup>ns</sup>              | -0.10 <sup>ns</sup> | 9873.3     |
| <b>Seed set model</b>   |              |                               |              |            |                                 |                     |            |
| <b>(B1) 2004</b>        |              | <b>(s) Small scale (80cm)</b> |              | <b>AIC</b> | <b>(l) Larger scale (200cm)</b> |                     | <b>AIC</b> |
|                         |              | <i>Intra</i>                  | <i>Inter</i> |            | <i>Intra</i>                    | <i>Inter</i>        |            |
| <b>Weighted density</b> |              |                               |              |            |                                 |                     |            |
| <b>MA</b>               | neutral      | -0.02***                      |              | 52982      | 0.03                            |                     | 52944      |
| <b>lines</b>            | differential | -0.02**                       | -0.07***     | 52948      | 0.03***                         | 0.15***             | 52939      |

| (B2) 2005               |              | (s) Small scale (80cm) |              | AIC   | (l) Larger scale (200cm) |              | AIC   |
|-------------------------|--------------|------------------------|--------------|-------|--------------------------|--------------|-------|
|                         |              | <i>Intra</i>           | <i>Inter</i> |       | <i>Intra</i>             | <i>Inter</i> |       |
| <b>Weighted density</b> |              |                        |              |       |                          |              |       |
| <b>MA</b>               | neutral      | -0.008*                |              | 49103 | -0.008*                  |              | 49049 |
| <b>lines</b>            | differential | -0.009**               | -0.09***     | 49095 | -0.01*                   | 0.16***      | 49026 |

456

457 Table 2. The coefficient and AIC from eco-evolutionary trait-based neighborhood models of the  
458 *Arabidopsis thaliana* field experiment in the years 2004 and 2005. Models include intraspecific  
459 genetic variation defined as intra-genotypic (within genotypes) and inter-genotypic (between  
460 genotypes) variation. Models are shown at two different spatial scales: weighted subblock  
461 density (80cm radius) and weighted block density (200cm radius). All scales include variables of  
462 neutral effects (absence of intra- and inter-genotypic variation (total sum of all neighboring  
463 genotypes)) and differential effects (presence of intra- and inter-genotypic variation (split of  
464 neighboring genotypes in intra- and inter-genotypic genotypes). Thus, neighbor identity is split  
465 into intra- and inter-genotypes as differential effects or are combined as neutral effects, which  
466 includes all neighbors. P-value levels <0.05\*, <0.005\*\*, <0.001\*\*\* and >0.05<sup>ns</sup>.

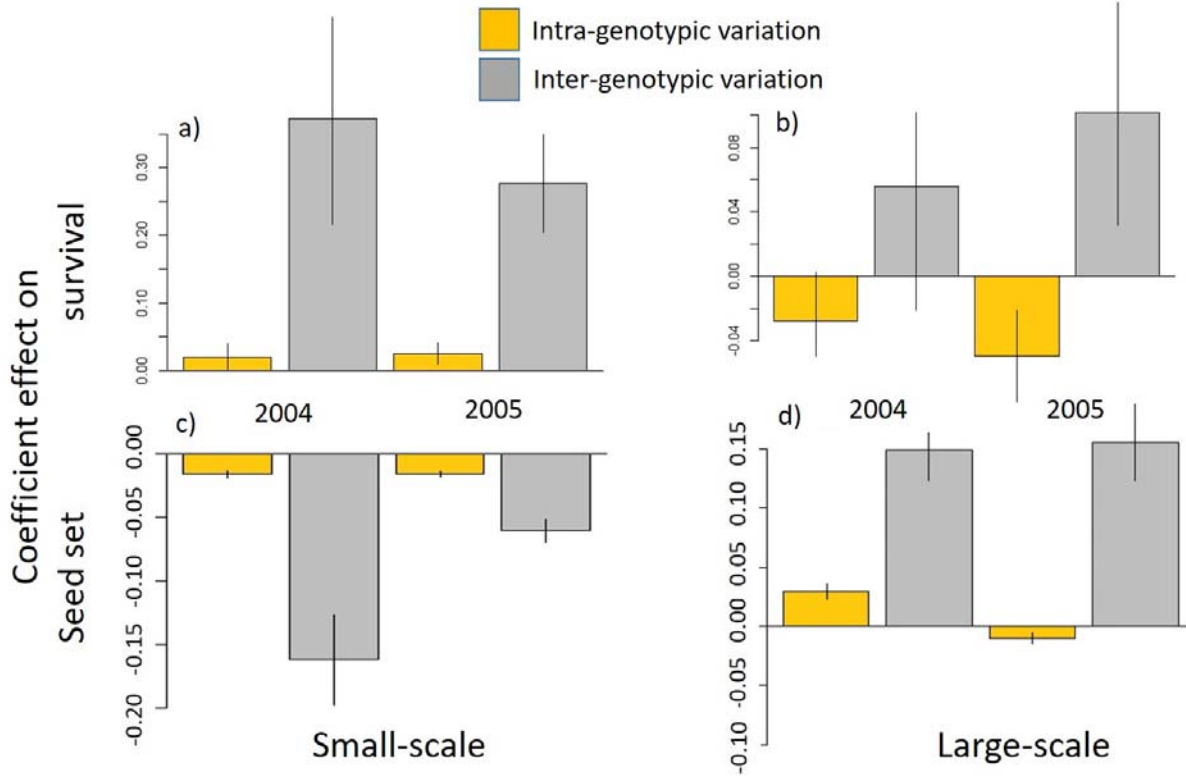

467

468 Figure 2. The barplots show standardized coefficient effect sizes and associated standard errors

469 of eco-evolutionary trait-based neighborhood models at small-scale (a, c) and large-scale (b, d)

470 for all MA-lines for the survival model (a, b) and the seed set model (c, d). Intra-genotypic

471 effects (yellow) and inter-genotypic effects (grey) are presented for 2004 and 2005. Coefficient

472 effect sizes indicate reduction or an increase of seed set depending on biomass density of intra-

473 or inter-genotypic neighbors. In addition, coefficient effect sizes indicate a reduction of survival

474 of intra or inter-genotypic neighbors.

475

### MA line effect sizes of seed set (a), (b) and survival (c) model

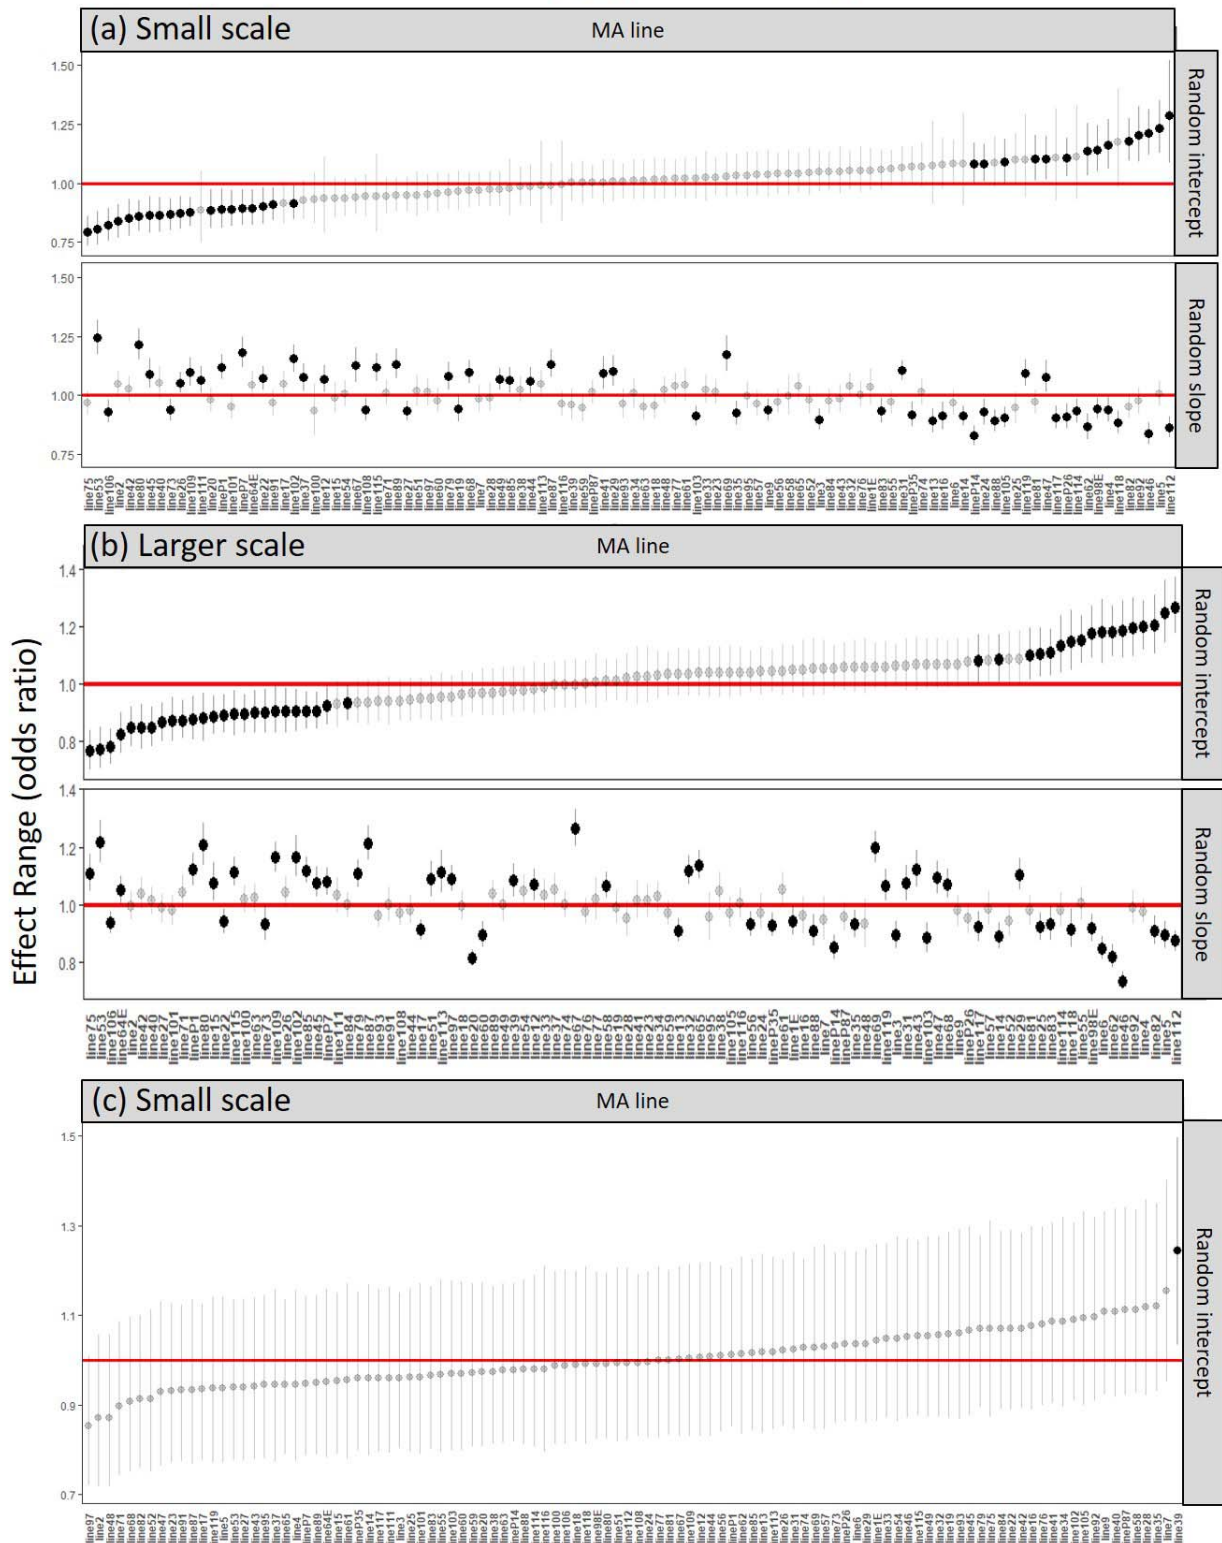

477 Figure 3. The effect range on seed set (a), (b) and survival (c) computed from eco-evolutionary  
478 trait-based neighborhood models shown as odds ratios for year 2004 (for 2005 see  
479 Supplementary Material). (a) Shows the hierarchical competitive order of MA lines and founder  
480 for the seed set model including range effects of each MA line and founder as random  
481 intercepts and the trait proxy biomass as random slopes at small-scale and (b) at large-scale. (c)  
482 Shows the hierarchical selective order of MA lines and founder for the survival model including  
483 range effects of each MA line and founder as random intercepts at small-scale.

484

### Correlation between MA line effect sizes of significant seed set and survival model

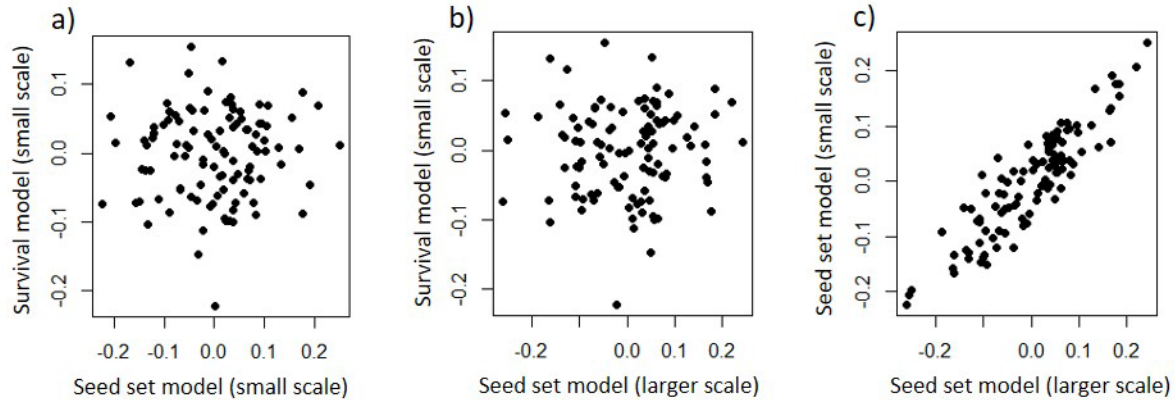

485

486 Figure 4. Correlation of the simulated conditional mean represented as odds ratio of same  
487 genotypes (MA lines) reducing or increasing the effect sizes of the seed set model and of the  
488 survival model at small-scale or large-scale for 2004, respectively. For year 2005 see  
489 supplementary material. Each point represents different genotypes of *A. thaliana*. Negative  
490 values means lower effect sizes on the survival or seed set and positive values means increasing  
491 the effect sizes on the survival or seed set. a) Relationship between survival and seed set  
492 model. b) Relationship between survival and seed set model. c) Relationship between small-  
493 scale survival and large-scale seed set model. Since we are plotting effect sizes, the positive  
494 correlation in panel c reflects a trade-off between competition and facilitation (see results).

495



496 References

- 497 Adler P., B., HilleRisLambers Janneke & Levine J. M. (2007). A niche for neutrality. *Ecology Letters*,  
498 10, 95–104.
- 499 Agrawal, A.A., Hastings, A.P., Johnson, M.T.J., Maron, J.L. & Salminen, J.-P. (2012). Insect  
500 herbivores drive real-time ecological and evolutionary change in plant populations. *Science*,  
501 338, 113–116.
- 502 Antonovics, J. (1976). The Nature of Limits to Natural Selection. *Annals of the Missouri Botanical*  
503 *Garden*, 63, 224–247.
- 504 Bailey JK et al. 2009 From genes to ecosystems: a synthesis of the effects of plant genetic factors  
505 across levels of organization. *Phil. Trans. R. Soc. B* **364**, 1607–1616.  
506 (doi:10.1098/rstb.2008.0336)
- 507 Baron E., Richirt J., Villoutreix R., Amsellem L., Roux F. & Bennett A. (2015). The genetics of intra-  
508 and interspecific competitive response and effect in a local population of an annual plant  
509 species. *Functional Ecology*, 29, 1361–1370.
- 510 Bataillon, T. (2003). Shaking the ‘deleterious mutations’ dogma? *Trends in Ecology & Evolution*,  
511 18, 315–317.
- 512 Bates, D., Mächler, M., Bolker, B. & Walker, S. (2014). Fitting Linear Mixed-Effects Models using  
513 lme4. *arXiv:1406.5823 [stat]*.
- 514 Bellard C., Bertelsmeier C., Leadley P., Thuiller W. & Courchamp F. (2012). Impacts of climate  
515 change on the future of biodiversity. *Ecology Letters*, 15, 365–377.

- 516 Bolnick, D.I., Amarasekare, P., Araújo, M.S., Bürger, R., Levine, J.M., Novak, M., *et al.* (2011). Why  
517 intraspecific trait variation matters in community ecology. *Trends in Ecology & Evolution*, 26,  
518 183–192.
- 519 Bossdorf Ol., Prati D., Auge H. & Schmid B. (2004). Reduced competitive ability in an invasive  
520 plant. *Ecology Letters*, 7, 346–353.
- 521 Burnham and Anderson (2002). *Model Selection and Multimodel Inference: A Practical*  
522 *Information-Theoretical Approach*. 2d ed. New York: Springer-Verlag
- 523 Bruno, J.F., Stachowicz, J.J. & Bertness, M.D. (2003). Inclusion of facilitation into ecological  
524 theory, 7.
- 525 Cahill, F. J., Kembel, S. W. and Gustafson, D. J. (2005), Differential genetic influences on  
526 competitive effect and response in *Arabidopsis thaliana*. *Journal of Ecology*, 93: 958-967.  
527 doi:10.1111/j.1365-2745.2005.01013.x
- 528 Cahill, J.F., Elle, E., Smith, G.R. & Shore, B.H. (2008). Disruption of a belowground mutualism  
529 alters interactions between plants and their floral visitors. *Ecology*, 89, 1791–1801.
- 530 Camara, M. d. and M. Pigliucci. (1999). Mutational contributions to genetic variance-covariance  
531 matrices: An experimental approach using induced mutations in *Arabidopsis thaliana*.  
532 *Evolution* 53 (6), 1692-1703
- 533 Caradus, J. & Woodfield, D. *Plant and Soil* (1998) 200: 63.  
534 <https://doi.org/10.1023/A:1004296707631>

- 535 Carr, D. E. and Dudash, M. R. (1996), Inbreeding depression in two species of *Mimulus*  
536 (Scrophulariaceae) with contrasting mating systems. *American Journal of Botany*, 83: 586-  
537 593. doi:10.1002/j.1537-2197.1996.tb12743.x
- 538 Castellanos Maria Clara, Donat-Caerols Santiago, González-Martínez Santiago C., Verdú Miguel &  
539 Gómez-Aparicio Lorena. (2014). Can facilitation influence the spatial genetics of the  
540 beneficiary plant population? *Journal of Ecology*, 102, 1214–1221.
- 541 Chapin, F. S. III, Autumn, K., & Pugnaire, F. (1993). Evolution of suites of traits in response to  
542 environmental stress. *American Naturalist*, 142, S78–S92.
- 543 Chase, J. M. et al. 2002. The interaction between predation and competition: a review and  
544 synthesis. – *Ecol. Lett.* 5: 302–315.
- 545 Chave, J., Muller-Landau, H.C. & Levin, S.A. (2002). Comparing Classical Community Models:  
546 Theoretical Consequences for Patterns of Diversity. *The American Naturalist*, 159, 1–23.
- 547 Chesson, P. (2000). Mechanisms of Maintenance of Species Diversity. *Annual Review of Ecology*  
548 *and Systematics*, 31, 343–366.
- 549 Clark, J.S. (2010). Individuals and the Variation Needed for High Species Diversity in Forest Trees.  
550 *Science*, 327, 1129–1132.
- 551 Colwell, R.K. & Rangel, T.F. (2009). Hutchinson’s duality: The once and future niche. *PNAS*, 106,  
552 19651–19658.
- 553 Connell, J. (1980). Diversity and the Coevolution of Competitors, or the Ghost of Competition  
554 Past. *Oikos*, 35(2), 131-138. doi:10.2307/3544421

- 555 Damgaard, C. (2004). Inference from plant competition experiments: the effect of spatial  
556 covariance. *Oikos*, 107, 225–230.
- 557 Dudley, S. A., Murphy, G. P., File, A. L. and Robinson, D. (2013), Kin recognition and competition  
558 in plants. *Funct Ecol*, 27: 898-906. doi:[10.1111/1365-2435.12121](https://doi.org/10.1111/1365-2435.12121)
- 559 Ehlers, B.K., Damgaard, C.F. & Laroche, F. (2016). Intraspecific genetic variation and species  
560 coexistence in plant communities. *Biology Letters*, 12, 20150853.
- 561 Exposito-Alonso M, Becker C, Schuenemann VJ, Reiter E, Setzer C, Slovak R, et al. (2018) The rate  
562 and potential relevance of new mutations in a colonizing plant lineage. *PLoS Genet* 14(2):  
563 e1007155. <https://doi.org/10.1371/journal.pgen.1007155>
- 564 Falahati-Anbaran, M., Lundemo, S. and Stenøien, H. K. (2014), Seed dispersal in time can  
565 counteract the effect of gene flow between natural populations of *Arabidopsis thaliana*. *New*  
566 *Phytol*, 202: 1043-1054. doi:[10.1111/nph.12702](https://doi.org/10.1111/nph.12702)
- 567 Fisher C.K. and Mehta P.(2014). The transition between the niche and neutral regimes in ecology.  
568 *Proc Natl Acad Sci USA* 111:13111–13116
- 569 Fournier-Level A, et al.(2016) Predicting the evolutionary dynamics of seasonal adaptation to  
570 novel climates in *Arabidopsis thaliana*. *Proc Natl Acad Sci USA* 113(20):E2812–E2821.
- 571 Fridley, J.D. & Grime, J.P. (2010). Community and ecosystem effects of intraspecific genetic  
572 diversity in grassland microcosms of varying species diversity. *Ecology*, 91, 2272–2283.

- 573 Fussmann G. F., Loreau M. & Abrams P. A. (2007). Eco-evolutionary dynamics of communities and  
574 ecosystems. *Functional Ecology*, 21, 465–477.
- 575 Genung, M. A., Schweitzer, J. A., Úbeda, F. , Fitzpatrick, B. M., Pregitzer, C. C., Felker-Quinn, E.  
576 and Bailey, J. K. (2011), Genetic variation and community change – selection, evolution, and  
577 feedbacks. *Functional Ecology*, 25: 408-419. doi:10.1111/j.1365-2435.2010.01797.x
- 578 Hamilton, W. D. 1964. The genetical evolution of social behaviour. *I & II. J. Theor. Biol.* 7:1–52.
- 579 Hart, S. P., Schreiber, S. J., Levine, J. M. and Coulson, T. (2016), How variation between individuals  
580 affects species coexistence. *Ecol Lett*, 19: 825-838. doi:[10.1111/ele.12618](https://doi.org/10.1111/ele.12618)
- 581 Hart, S. P., Freckleton, R. P., Levine, J.M. & Kroon, H. (2018). How to quantify competitive ability.  
582 *Journal of Ecology*, 0.
- 583 Hausmann N. J., Juenger T. E., Sen S., Stowe K. A., Dawson T. E., et al., 2005. Quantitative trait loci  
584 affecting  $\delta C^{13}$  and response to differential water availability in *Arabidopsis thaliana*. *Evolution*  
585 59: 81–96
- 586 Hofhuis, H. and Hay, A. (2017), Explosive seed dispersal. *New Phytol*, 216: 339-342.  
587 doi:10.1111/nph.14541
- 588 Holt, R.D. (2009). Bringing the Hutchinsonian niche into the 21st century: Ecological and  
589 evolutionary perspectives. *PNAS*, 106, 19659–19665.
- 590 Hubbell S.P. (2005). Neutral theory in community ecology and the hypothesis of functional  
591 equivalence. *Functional Ecology*, 19, 166–172.
- 592 Hutchinson G.E. (1957). *Concluding remarks. Cold Spring Harbor Symp Quant Biol* 22:415–427.

- 593 Johnson, M.T.J. Stinchcombe, J.R. An emerging synthesis between community ecology and  
594 evolutionary biology *Trends Ecol. Evol.*, 22 (2007), pp. 250-257
- 595 Johnson, M.T.J., Vellend, M. & Stinchcombe, J.R. (2009). Evolution in plant populations as a driver  
596 of ecological changes in arthropod communities. *Philosophical Transactions of the Royal  
597 Society of London B* 364:1593-1605.
- 598 Kerwin et al. (2015) Natural genetic variation in *Arabidopsis thaliana* defense metabolism genes  
599 modulates field fitness | eLife Lens. <https://lens.elifesciences.org/05604/>. Last accessed 4  
600 May 2018.
- 601 Koch, H., Frickel, J., Valiadi, M. & Becks, L. (2014). Why rapid, adaptive evolution matters for  
602 community dynamics. *Front. Ecol. Evol.*, 2.
- 603 Kubisch A. *et al.* (2013). Kin competition as a major driving force for invasions. *Am. Nat.* 181: 700–  
604 706
- 605 Lachmuth S., Henrichmann C., Horn J., Pagel J., Schurr F.M. & Rafferty N. (2018). Neighbourhood  
606 effects on plant reproduction: An experimental–analytical framework and its application to  
607 the invasive *Senecio inaequidens*. *Journal of Ecology*, 106, 761–773.
- 608 Lankau, R.A. (2011). Rapid Evolutionary Change and the Coexistence of Species. *Annual Review of  
609 Ecology, Evolution, and Systematics*, 42, 335–354.
- 610 Lankau, R.A. & Strauss, S.Y. (2007). Mutual feedbacks maintain both genetic and species diversity  
611 in a plant community. *Science*, 317, 1561–1563.

- 612 Lankau R. A., Wheeler E., Bennett A. E. & Strauss S. Y. (2010). Plant–soil feedbacks contribute to  
613 an intransitive competitive network that promotes both genetic and species diversity. *Journal*  
614 *of Ecology*, 99, 176–185.
- 615 Latzel, V., Allan, E., Bortolini Silveira, A., Colot, V., Fischer, M. & Bossdorf, O. (2013). Epigenetic  
616 diversity increases the productivity and stability of plant populations. *Nat Commun*, 4, 2875.
- 617 Laure, G. Zimmermann N. E., Levine J. M., Adler P.r B. & Wootton T (2017). The effects of  
618 intransitive competition on coexistence. *Ecology Letters*, 20, 791–800.
- 619 Levine, J.M. & HilleRisLambers, J. (2009). The importance of niches for the maintenance of  
620 species diversity. *Nature*, 461, 254–257.
- 621 Lion, S. (2018) Theoretical approaches in evolutionary ecology: Environmental feedback as a  
622 unifying perspective. *Am. Nat.*191, 21–44.
- 623 Lynch, M., and B. Walsh. (1998). Genetics and analysis of quantitative traits. Sinauer Associates,  
624 Inc., Sunderland, MA.
- 625 Masclaux, F., Hammond, R. L., Meunier, J. , Gouhier-Darimont, C. , Keller, L. and Reymond, P.  
626 (2010), Competitive ability not kinship affects growth of *Arabidopsis thaliana* accessions. *New*  
627 *Phytologist*, 185: 322-331. doi:10.1111/j.1469-8137.2009.03057.x
- 628 Mukai, T. (1964). The Genetic Structure of Natural Populations of *Drosophila Melanogaster*. I.  
629 Spontaneous Mutation Rate of Polygenes Controlling Viability. *Genetics*, 50, 1–19.
- 630 Nei, M. (2013). Mutation-driven evolution. Oxford University Press

- 631 Nottebrock H., Schmid B., Mayer K., Devaux C., Esler K. J., Böhning-Gaese K., *et al.* (2017a). Sugar  
632 landscapes and pollinator-mediated interactions in plant communities. *Ecography*, 40, 1129–  
633 1138.
- 634 Nottebrock H., Schmid B., Treurnicht M., Pagel J., Esler K. J., Böhning-Gaese K., *et al.* (2017b).  
635 Coexistence of plant species in a biodiversity hotspot is stabilized by competition but not by  
636 seed predation. *Oikos*, 126.
- 637 Ossowski, S., K. Schneeberger, J. I. Lucas-Lledó, N. Warthmann, R. M. Clark, R. G. Shaw, D. Weigel,  
638 and M. Lynch. (2010). The rate and molecular spectrum of spontaneous mutations in  
639 *Arabidopsis thaliana*. *Science* 327:92–94.
- 640 Roles, A. J., and J. K. Conner. (2008). Fitness effects of mutation accumulation in a natural  
641 outbred population of wild radish (*Raphanus raphanistrum*): comparison of field and  
642 greenhouse environments. *Evolution*, 62: 1066-1075. doi:[10.1111/j.1558-5646.2008.00354.x](https://doi.org/10.1111/j.1558-5646.2008.00354.x)
- 643 Roles, A. J., M. T. Rutter, C. B. Fenster and J. K. Conner. (2016). Field measurement of genotype by  
644 environment interaction for fitness caused by spontaneous mutations in *Arabidopsis thaliana*.  
645 *Evolution*, 70: 1039-1050.
- 646 R Development Core Team (2011). R: A language and environment for statistical computing.  
647 Vienna, Austria: R Foundation for Statistical Computing.
- 648 Rutter, M. T., F. H. Shaw and C. B. Fenster. (2010). Spontaneous mutation parameters for  
649 *Arabidopsis thaliana* measured in the wild. *Evolution*, 64: 1825-1835.



- 650 Rutter, M., A. Roles, J. Conner, R. Shaw, F. Shaw, K. Schneeberger, S. Ossowski, D. Weigel and C.  
651 B. Fenster. (2012). Brief Communication: Fitness of *Arabidopsis thaliana* mutation  
652 accumulation lines whose spontaneous mutations are known. *Evolution*, 66: 2335-2339.
- 653 Rutter, M. T., A. J. Roles, and C. B. Fenster. (2018). Quantifying natural seasonal variation in  
654 mutation parameters with mutation accumulation lines. *Ecology and Evolution*,  
655 <https://doi.org/10.1002/ece3.4085>
- 656 Schaack, S., Allen, D.E., Latta, L.C., Morgan, K.K. & Lynch, M. (2013). The effect of spontaneous  
657 mutations on competitive ability. *Journal of Evolutionary Biology*, 26, 451–456.
- 658 Shaw, R.G., Byers, D.L. & Darms, E. (2000). Spontaneous Mutational Effects on Reproductive  
659 Traits of *Arabidopsis thaliana*. *Genetics* 155:369–378.
- 660 Shaw, F. H., C. J. Geyer, and R. G. Shaw. (2002). A comprehensive model of mutations affecting  
661 fitness and inferences for *Arabidopsis thaliana*. *Evolution* 56:453–463.
- 662 Shefferson Richard P., Salguero-Gómez Roberto & Rees Mark. (2015). Eco-evolutionary dynamics  
663 in plants: interactive processes at overlapping time-scale and their implications. *Journal of*  
664 *Ecology*, 103, 789–797.
- 665 Soliveres, S., Smit, C. & Maestre, F.T. (2015). Moving forward on facilitation research: response to  
666 changing environments and effects on the diversity, functioning and evolution of plant  
667 communities. *Biol Rev Camb Philos Soc*, 90, 297–313.
- 668 Soliveres Set al. (2015). Intransitive competition is widespread in plant communities and  
669 maintains their species richness. *Ecol. Lett.* 18, 790–798. doi:10.1111/ele.12456

- 670 Stearns, F. W. and C. B. Fenster. (2016). The effect of induced mutations on quantitative traits in  
671 *Arabidopsis thaliana*: Natural versus artificial conditions. *Ecology and Evolution*, doi:  
672 10.1002/ece3.2558
- 673 Strauss, S.Y. & Irwin, R.E. (2004). Ecological and evolutionary consequences of multispecies  
674 plant-animal interactions. *Annu. Rev. Ecol. Evol. Syst.*, 35, 435–466.
- 675 Taylor, D.R., Aarssen, L.W. & Loehle, C. (1990). On the Relationship between *r*/*K* Selection and  
676 Environmental Carrying Capacity: A New Habitat Templet for Plant Life History Strategies.  
677 *Oikos*, 58, 239–250.
- 678 Tiffin, P. (2002). Competition and time of damage affect the pattern of selection acting on plant  
679 defense against herbivores. *Ecology*, 83: 1981-1990. doi:10.1890/0012-  
680 9658(2002)083[1981:CATODA]2.0.CO;2
- 681 Tilman D. (2004). Niche tradeoffs, neutrality, and community structure: a stochastic theory of  
682 resource competition, invasion, and community assembly. *Proc. Natl Acad. Sci. USA* 101, 10  
683 854–10 861. doi:10.1073/Pnas.0403458101
- 684 Turcotte, M.M. & Levine, J.M. (2016). Phenotypic Plasticity and Species Coexistence. *Trends Ecol.*  
685 *Evol. (Amst.)*, 31, 803–813.
- 686 Uriarte, M., Swenson, N.G., Chazdon, R.L., Comita, L.S., John Kress, W., Erickson, D., *et al.* (2010).  
687 Trait similarity, shared ancestry and the structure of neighbourhood interactions in a  
688 subtropical wet forest: implications for community assembly. *Ecol. Lett.*, 13, 1503–1514.

- 689 Van Dam, N. M. and Baldwin, I. T. (1998), Costs of jasmonate-induced responses in plants  
690 competing for limited resources. *Ecology Letters*, 1: 30-33. doi:10.1046/j.1461-  
691 0248.1998.00010.x
- 692 Vellend Mark & Geber Monica A. (2005). Connections between species diversity and genetic  
693 diversity. *Ecology Letters*, 8, 767–781.
- 694 Violle, C., Enquist, B.J., McGill, B.J., Jiang, L., Albert, C.H., Hulshof, C., *et al.* (2012). The return of  
695 the variance: intraspecific variability in community ecology. *Trends in Ecology & Evolution*, 27,  
696 244–252.
- 697 Violle, C. & Jiang, L. (2009). Towards a trait-based quantification of species niche. *J Plant Ecol*, 2,  
698 87–93.
- 699 Violle, C., Thuiller, W., Mouquet, N., Munoz, F., Kraft, N.J.B., Cadotte, M.W., *et al.* (2017).  
700 Functional Rarity: The Ecology of Outliers. *Trends in Ecology & Evolution*, 32, 356–367.
- 701 Weng, M.-L., Becker, C., Hildebrandt, J., Rutter, M.T., Shaw, R.G., Weigel, D. and C. B. Fenster.  
702 Fine-Grained Analysis of Spontaneous Mutation Spectrum and Frequency in *Arabidopsis*  
703 *thaliana* Genetics. Early online (2018); <https://doi.org/10.1534/genetics.118.301721>
- 704 Whitham, T. G., Young, W. P., Martinsen, G. D., Gehring, C. A., Schweitzer, J. A., Shuster, S. M.,  
705 Wimp, G. M., Fischer, D. G., Bailey, J. K., Lindroth, R. L., Woolbright, S. and Kuske, C. R. (2003),  
706 Community and ecosystem genetics: A consequence of extended phenotype. *Ecology*, 84:  
707 559-573. doi:10.1890/0012-9658(2003)084[0559:CAEGAC]2.0.CO;2

708 Whitham, T.G., Bailey, J.K., Schweitzer, J.A., Shuster, S.M., Bangert, R.K., LeRoy, C.J. *et al.* (2006).

709 A framework for community and ecosystem genetics: from genes to ecosystems. *Nat. Rev.*

710 *Genet.*, 7, 510–523.

711 Whitlock R. & Lortie C. (2014). Relationships between adaptive and neutral genetic diversity and

712 ecological structure and functioning: a meta-analysis. *Journal of Ecology*, 102, 857–872.

713

714

715

716
